# Supplementary material
Source: publisher site journal article supplement (https://static.cambridge.org/content/id/urn:cambridge.org:id:article:S0899823X19000904/resource/name/S0899823X19000904supp004.docx)
Supplement: Supplementary file 1 [file S0899823X19000904supp004.docx]

Appendix Table 1: Relationships between Home Infusion Agency, Home Nursing Agency, and Medical Centers

|  | Infusion Nurses (N=87) | Healthcare Epidemiologists* (N=27) | Home Infusion Agencies (N=26) | p-value |
| --- | --- | --- | --- | --- |
| Home infusion agency affiliated with academic medical center or hospital | N/A | 27 (100.0%) | 3 (11.5%) | <0.001 |
| Home infusion agency affiliated with hospital or health system | 38 (46.9%) (of 81) | 27 (100.0%) | 14 (53.8%) | <0.001 |
| Home nursing company affiliated with hospital or health system | 36 (51.4%) (of 70) | N/A | N/A | N/A |
| Home infusion agency and home nursing agency are the same organization | 41 (61.2%) (of 67) | N/A | 2 (7.7%) | <0.001 |
| Home infusion agency employs nurses | N/A | N/A | 4 (17.4%) (of 23) | N/A |
| Home infusion agency subcontracts to a home nursing agency | 19 (27.5%) (of 69) | N/A | 9 (39.1%) (of 23) | 0.98 |
| Home infusion agency subcontracts and directly employs nurses | 3 (4.3%) (of 69) | N/A | N/A | N/A |
| Healthcare epidemiology department collaborates with home infusion or home nursing agency | 28 (36.8%) (of 76) | 15 (57.7%) (of 26) | N/A | 0.063 |
| Home infusion agency tracks CVC complications | 62 (77.5%) (of 80) | 11 (42.3%) (of 26) | 22 (95.7%) (of 23) | 0.047 |
| Where does the home infusion agency report data? Hospital or Health System | 24 (27.6%) | 7 (25.9%) | 6 (23.1%) | 0.90 |
| Internally | 46 (52.9%) | 6 (22.2%) | 17 (65.4%) | 0.004 |
| External Agency | 8 (9.2%) | 0 (0.0%) | 3 (11.5%) | 0.36 |
| Benchmarking collaborative or research project | 21 (24.1%) | N/A | 8 (30.8%) | 0.50 |
| Use in marketing | 1 (1.1%) | 0 (0.0%) | 3 (11.5%) | 0.043 |
| Healthcare epidemiology and infection control department | N/A | 7 (25.9%) | 10 (55.6%) (of 18) | 0.045 |
| How does the home infusion agency get information from hospitals? Electronic health records from affiliated hospitals | 11 (12.6%) | 7 (25.9%) | 6 (23.1%) | 0.10 |
| Communication with hospital staff | 12 (13.8%) | 3 (11.1%) | 5 (19.2%) | 0.73 |
| Discharge coordinator or case management | 10 (11.5%) | 2 (7.4%) | 3 (11.5%) | 0.83 |
| Request discharge summary or other medical records | 18 (20.7%) | 2 (7.4%) | 0 (0.0%) | 0.046 |
| From home health agency | 4 (4.6%) | 2 (7.4%) | 3 (11.5%) | 0.44 |
| Clinical liaisons | 6 (6.9%) | 3 (11.1%) | 1 (3.8%) | 0.58 |
| From patient or caregiver | 6 (6.9%) | 2 (7.4%) | 5 (19.2%) | 0.052 |
| From hospital infection prevention or quality assurance | 3 (3.4%) | 2 (7.4%) | 1 (3.8%) | 0.67 |
| Unsure | 1 (1.1%) | 6 (22.2%) | 0 (0.0%) | <0.001 |

Abbreviations: N/A: not asked; CVC: central venous catheter

*Healthcare epidemiologists were asked specifically about their main hospital’s internal home infusion agency.
